# Supplementary material
Source: PubMed Central journal article supplement (PMC3031906)
Supplement: NIHMS260632-supplement-01.pdf [file NIHMS260632-supplement-01.pdf]

A.

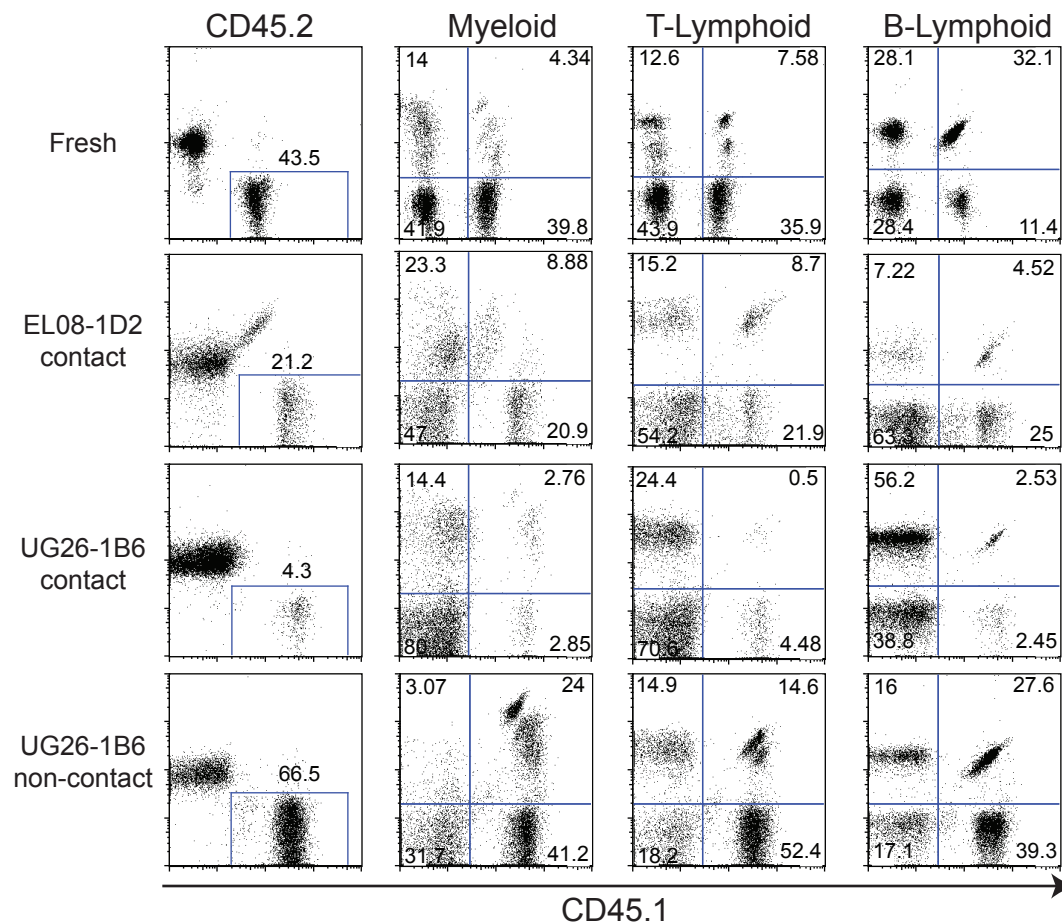

B.

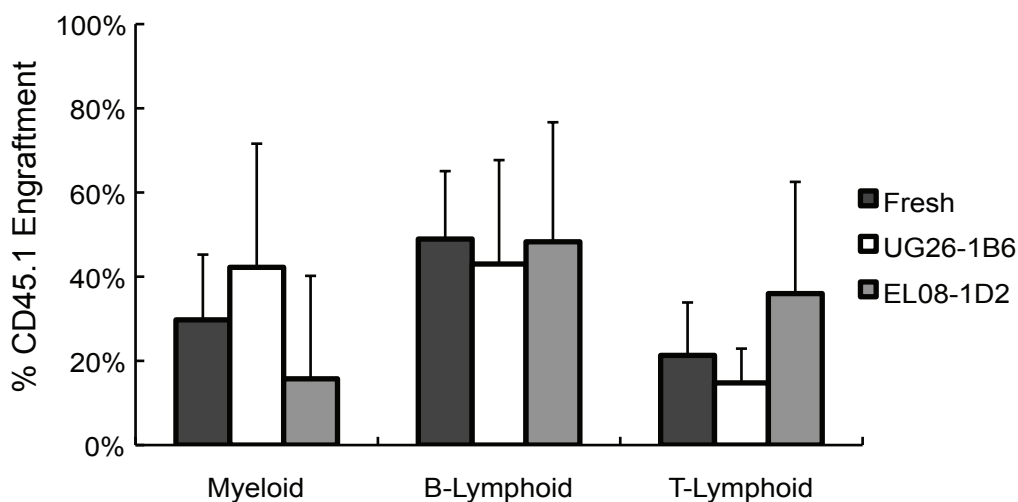

**Supplementary Figure 1. Lin- BM cells co-cultured in contact with all feeders and in transwells above UG26-1B6 cells have multi-lineage potential in competitive repopulation assays; however repopulation by progeny from EL08-1D2-contact cultures is skewed towards the T-lymphoid lineage.**

A combination of  $2 \times 10^5$  CD45.2+ competitor BM and 104 fresh CD45.1+ Lin- BM cells, or progeny from 104 CD45.1+ Lin- BM cells cultured for 3 weeks in contact with or in transwells above UG26-1B6 or EL08-1D2 cells were transplanted in CD45.2+ recipients. Twelve to sixteen weeks after transplantation, PB was collected and analyzed by FACS for presence of CD45.2+ and CD45.1+ cells, and for CD45.1+ cells co-labeling with anti-Gr-1/Mac-1+, anti-B220+, or anti-CD4/CD8+. A) The FACS plots demonstrate multi-lineage engraftment (Gr-1/Mac-1+, B220+, and CD4/CD8+ cells) of one representative mouse from each group transplanted with cells co-cultured with stromal cells. Analysis was done on PB 3 months after transplantation. B) The figure demonstrates multilineage repopulation of all transplanted mice that were engrafted with donor-derived cells. Bars represent percent  $\pm$  standard deviation for myeloid, B-lymphoid and T-lymphoid cells within the CD45.1+ population. Statistical significance in all experiments was determined by two-tail t-test.

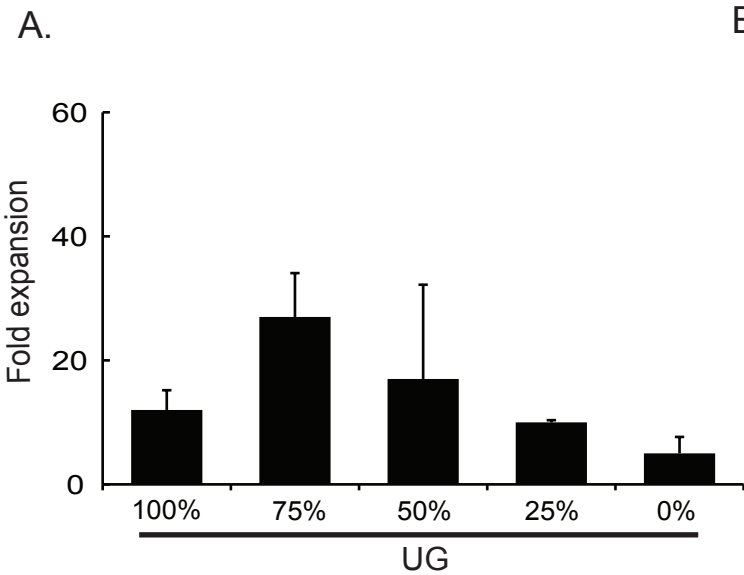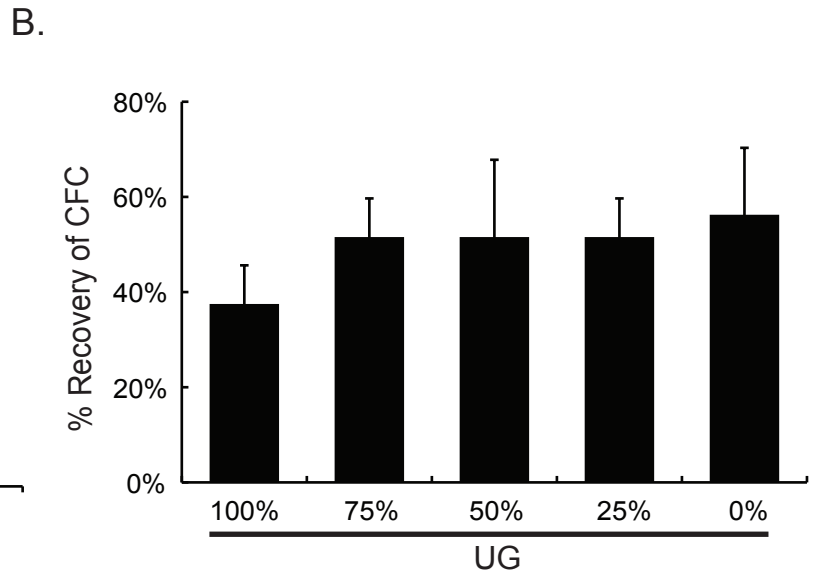

**Supplementary Figure 2. No significant differences in cell expansion and recovery of CFC when Lin- BM cells are cultured on feeders consisting of different ratios of UG26-1B6 and EL08-1D2.**

104 CD45.1+ Lin- BM cells were cultured in transwells above mixed feeders containing variable percentages of UG26-1B6 and EL08-1D2 cells, shown in the X-axis. A) After 3 weeks of culture nucleated cells were enumerated using trypan blue to assess cell expansion. B) After 3 weeks of culture the frequency of CFC was determined. CFCs were enumerated at day 12. % CFC recovery = (#CFC generated by the progeny of 104 Lin- BM cells recovered after 3 weeks of culture / #CFC / 104 fresh Lin- BM cells) x 100. Experiments were repeated three times with separate isolations of Lin- BM cells. Statistical significance in all experiments was determined by two-tail t-test.

A.

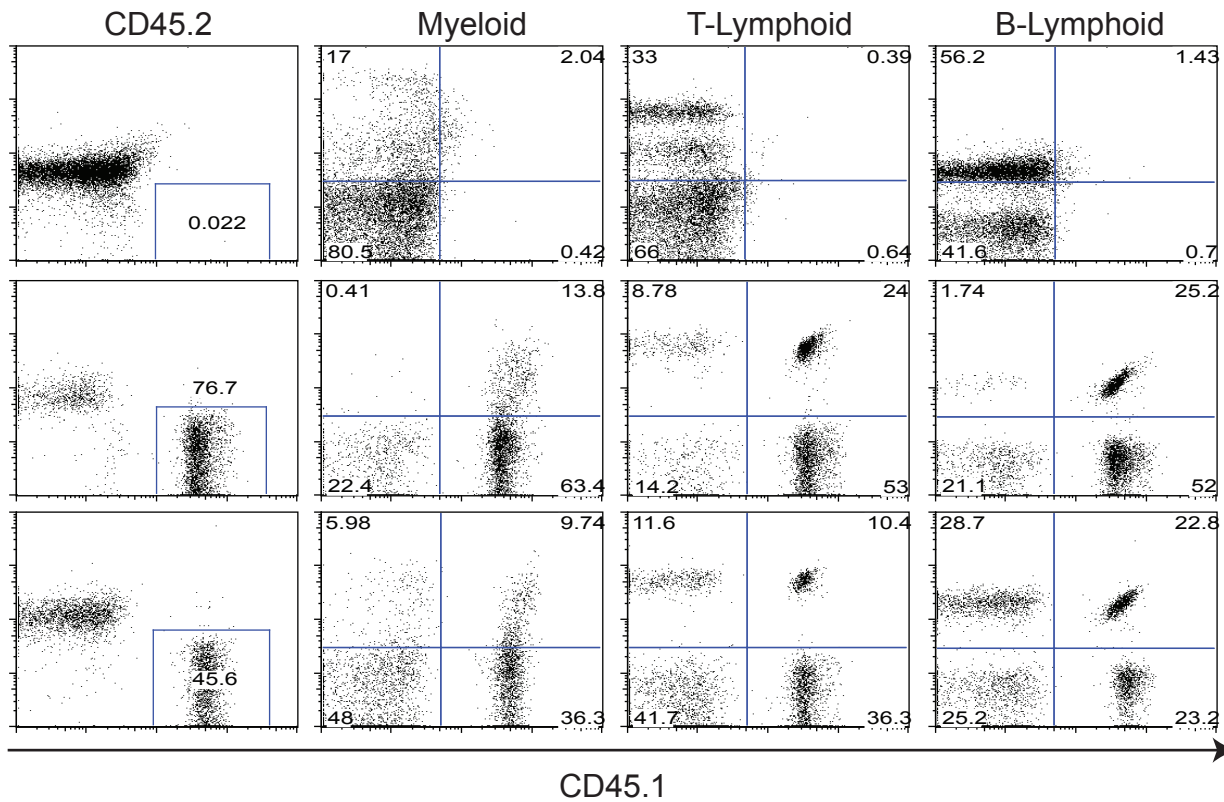

B.

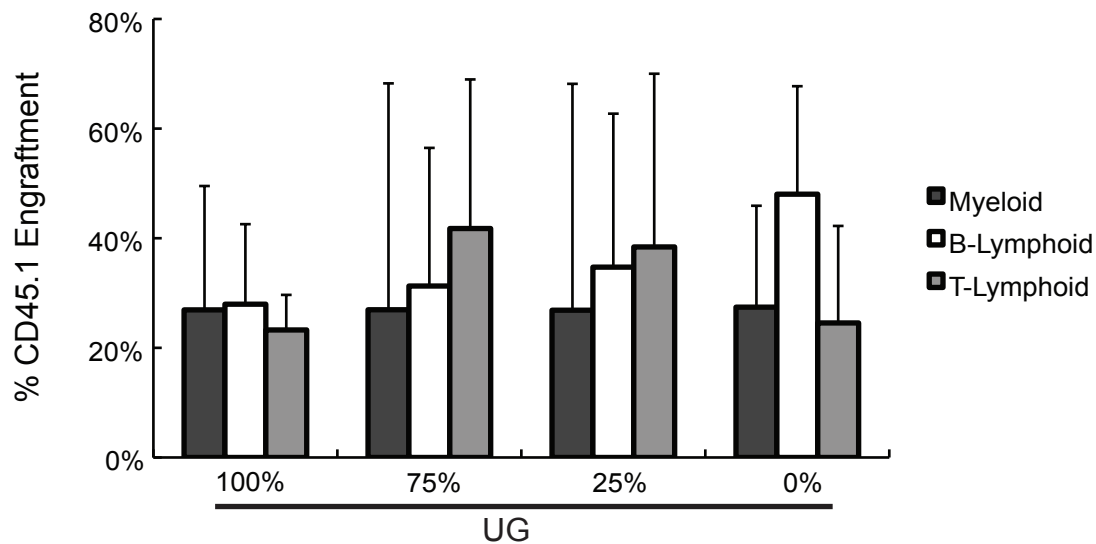

**Supplementary Figure 3. Lymphoid skewing is not found in animals repopulated with progeny from cultures of Lin<sup>-</sup> BM cells cultured above mixed feeders with 25% or more UG26-1B6 cells, combined with EL08-1D2 cells.**

A combination of  $2 \times 10^5$  CD45.2<sup>+</sup> competitor BM and 104 fresh CD45.1<sup>+</sup> Lin<sup>-</sup> BM cells, or progeny from 104 CD45.1<sup>+</sup> Lin<sup>-</sup> BM cells cultured for 3 weeks in contact with or in transwells above different mixtures of UG26-1B6 or EL08-1D2 cells were transplanted in CD45.2<sup>+</sup> recipients. Twelve to sixteen weeks after transplantation, PB was collected and analyzed by FACS for presence of CD45.2<sup>+</sup> and CD45.1<sup>+</sup> cells, and for CD45.1<sup>+</sup> cells co-labeling with anti-Gr-1/Mac-1<sup>+</sup>, anti-B220<sup>+</sup>, or anti-CD4/CD8<sup>+</sup>. A) The FACS profiles demonstrate multi-lineage engraftment (Gr-1/Mac-1<sup>+</sup>, B220<sup>+</sup>, and CD4/CD8<sup>+</sup> cells) of one representative mouse from each group that was transplanted with cells co-cultured with mixed stromal cells. PB of animals was analyzed at 12 weeks post transplantation. B) Bars represent percent of myeloid, B-lymphoid and T-lymphoid cells within the CD45.1<sup>+</sup> population. Statistical significance was determined by two-tail t-test.

A.

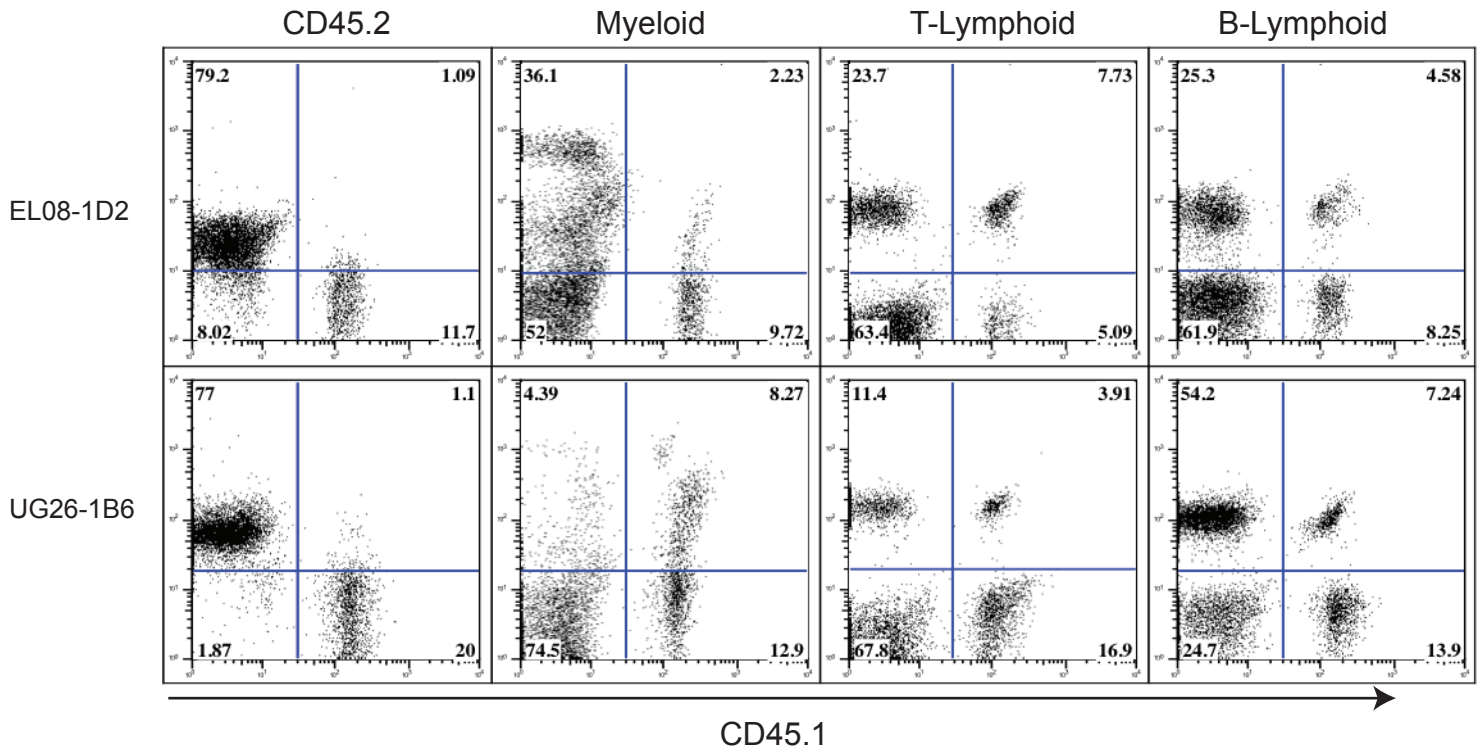

B.

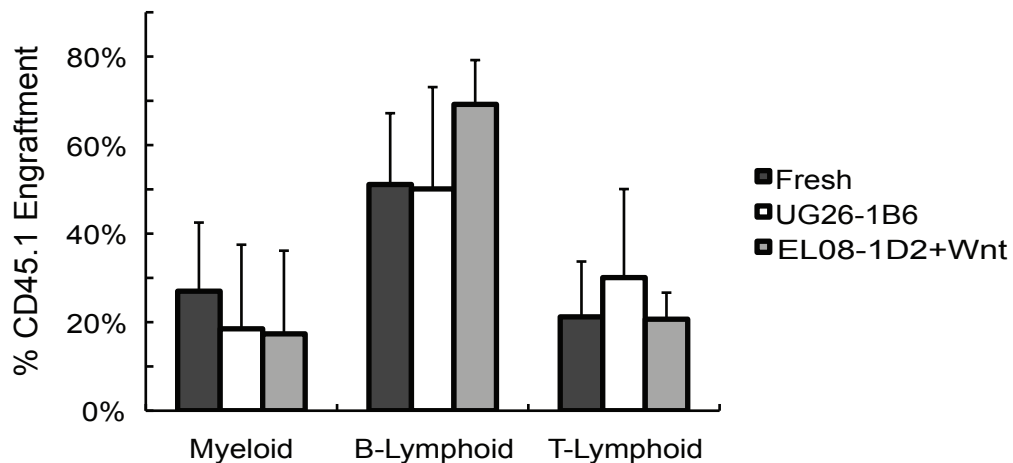

**Supplementary Figure 4. Addition of Wnt5a to EL08-1D2 non-contact cultures enables EL08-1D2 cells to support multilineage repopulating LTR-HSC in transwells above the feeder.**

Lin- BM cells were cultured in transwells above irradiated UG26-1B6 and EL08-1D2 cells with 10ng/ml Wnt5a. After 3 weeks, progeny of 104 CD45.1+ Lin- BM cells were transplanted together with 105 CD45.2+ fresh BM in lethally irradiated CD45.2+ recipients. After 4 months, PB of recipient animals was analyzed for CD45.1+ cells. A) The FACS plots demonstrate multi-lineage engraftment (Gr-1/Mac-1+, B220+, and CD4/CD8+ cells) of one representative mouse grafted with cells cultured above irradiated UG26-1B6 and EL08-1D2 cells with 10ng/ml Wnt5a. B) Bars represent percent of myeloid, B-lymphoid and T-lymphoid cells within the CD45.1+ population. Statistical significance was determined by two-tail t-test.

| (n=4)                  | %Chimerism in primary recipient PB | Percent of donor derived cells in secondary recipients |           |            |            |
|------------------------|------------------------------------|--------------------------------------------------------|-----------|------------|------------|
|                        |                                    | Total                                                  | Myeloid   | B Lymphoid | T Lymphoid |
| EL08-1D2 contact#1     | 31.8%                              | 2.5±1.7                                                | 11.6±7.7  | 71.2±19.6  | 17.2±15.2  |
| EL08-1D3 contact#2     | 86.7%                              | 43.7±7.1                                               | 10.3±4.2  | 13.5±15.5  | 79.3±12.4  |
| UG26-1B6 non-contact#1 | 7.1%                               | 68.9±6.3                                               | 53.6±15.5 | 5.7±1.4    | 40.7±14.3  |
| UG26-1B6 non-contact#2 | 5.7%                               | 7.8±14.9                                               | 64.9±10.6 | 21.6±13.5  | 13.5±15.7  |
|                        |                                    |                                                        |           |            |            |

**Supplementary Table 1. Culture of Lin- BM cell in UG26-1B6 non-contact cultures preserves LTR-HSC.**

1x10<sup>4</sup> Lin- CD45.1+ BM cells were cultured in contact with or transwells above confluent irradiated UG26-1B6 or ELO8-1D2 cells. After 3 weeks, progeny from the 1x10<sup>4</sup> Lin- CD45.1+ BM cells were transplanted with 2x10<sup>5</sup> fresh CD45.2+ TBM IV into C57BL/6J (CD45.2+) mice. After 3-4 months, 106 TBM cells from two separate primary recipients were injected into groups of four CD45.2+ secondary recipients for each primary recipient. The two separate primary recipients that were used for secondary transplantations are labeled #1 and #2. Peripheral blood was collected 3 months after transplantation, and analyzed by FACS for CD45.1+ derived cells. The total contribution of donor CD45.1+ cells or donor myeloid, B- or T-lymphoid cells was determined as described in the Materials and Methods section.
